# Supplementary material for: Bidirectional Tumor-Promoting Activities of Macrophage Ezrin
Source: PubMed Central journal article supplement (PMC7589996; doi:10.3390/ijms21207716), 2020-10-19
Supplement: ijms-21-07716-s001.pdf [file ijms-21-07716-s001.pdf]

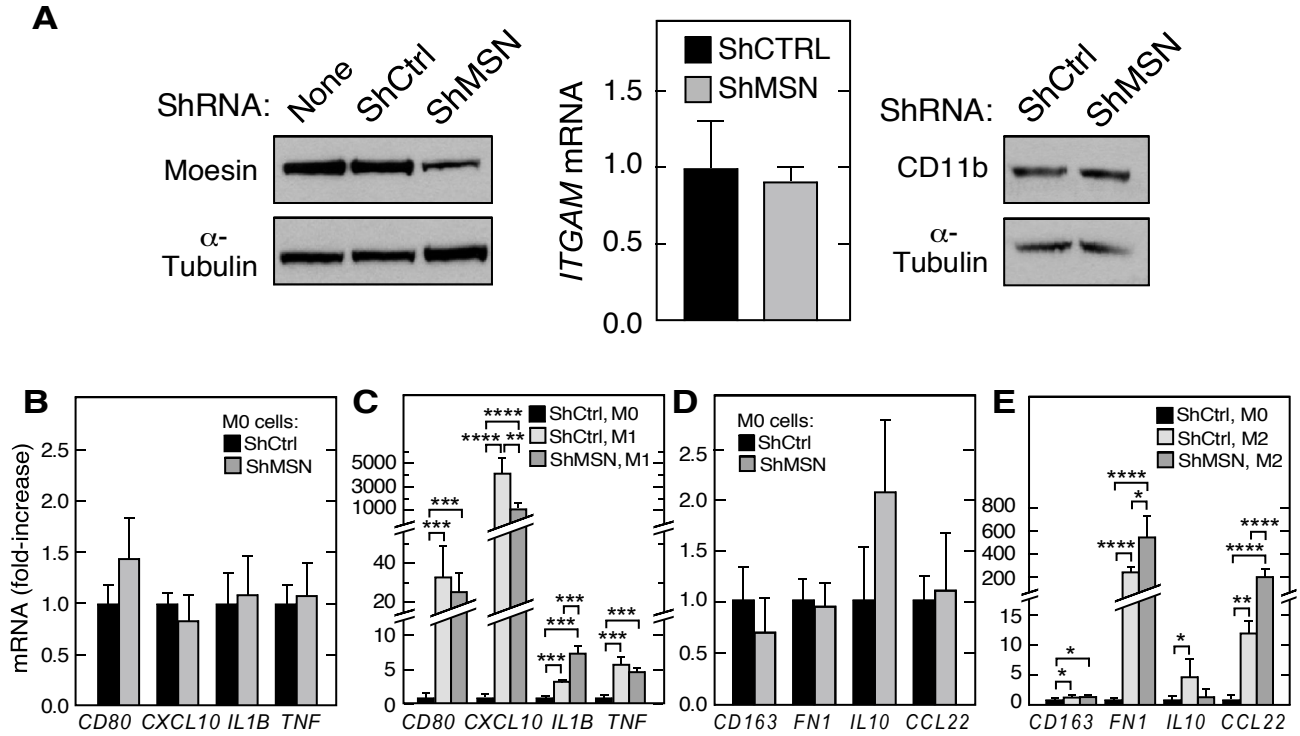

**Figure S1.** Role of moesin in myeloid cell gene expression and polarization. (A) Following moesin knockdown in THP-1 cells by moesin shRNA (ShMSN) (left), expression of *ITGAM* mRNA was determined by qPCR (center) and CD11b by immunoblot (right). (B) mRNAs encoding M1 marker proteins *CD80*, *CXCL10*, *IL1B*, and *TNF* were determined by RT-qPCR in M0 ShMSN cells and normalized to M0 ShCtrl cells. (C) ShMSN cells and ShCtrl were subjected to M1 polarization conditions, and mRNAs encoding M1 marker proteins determined as in (A) and normalized to M0 ShCtrl cells. (D) mRNAs encoding M2 marker proteins *CD163*, *FN1*, *IL10*, and *CCL22* were determined by RT-qPCR in M0 ShMSN cells and normalized to M0 ShCtrl cells. (E) ShMSN and ShCtrl cells were subjected to M2 polarization conditions and mRNAs encoding M2 markers determined, and normalized to M0 ShCtrl cells. Mean  $\pm$  standard deviation; \*, \*\*, \*\*\*, and \*\*\*\* indicate  $P < 0.05$ , 0.01, 0.001, and 0.0001, respectively.

**Table S1.** Summary of major results.

| <b>THP-1 cell function</b>                                                    | <b>Effect of ezrin knockdown</b>                                                                                                                                   |
|-------------------------------------------------------------------------------|--------------------------------------------------------------------------------------------------------------------------------------------------------------------|
| Adhesion to HUVEC monolayer                                                   | Reduced                                                                                                                                                            |
| Transmigration towards chemoattractant                                        | Reduced                                                                                                                                                            |
| Expression of chemokines and adhesion receptors                               | Pronounced reduction of ITGAM mRNA and CD11b                                                                                                                       |
| Macrophage polarization towards M0, M1, and M2 states                         | Non-significant change towards M0 polarization, but increased M1 and decreased M2 marker expression. Indicates ezrin-dependent expression of pro-tumorigenic state |
| Secretion of factors that influence breast cancer cell migration and invasion | Reduced                                                                                                                                                            |
| Secretion of factors that influence breast cancer cell clonogenic growth      | Reduced                                                                                                                                                            |
| Angiogenic potential                                                          | Reduced                                                                                                                                                            |
